# Supplementary material
Source: publisher site journal article supplement (https://www.dovepress.com/article/371536)
Supplement: Supplementary file 1 [file get_supplementary_file.php]

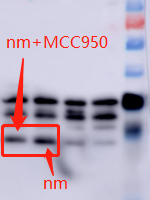

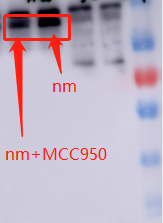
**Supplymentary Data**


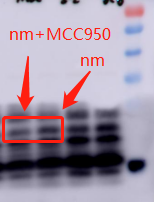


Figure S1 NLRP3 original image

Figure S2 ASC original image


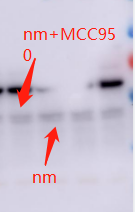


Figure S4 P20 original image

Figure S3 Pro-Caspase-1 original image


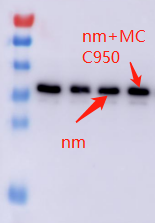

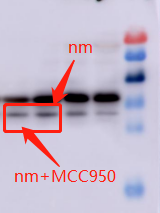

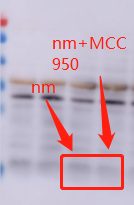


Figure S6 IL-1β original image

Figure S7 GAPDH original image

Figure S5 Pro-IL-1β original image


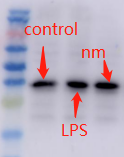

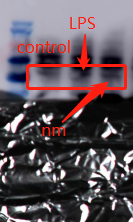


Figure S9 GAPDH original image

Figure S8 AIM2 original image


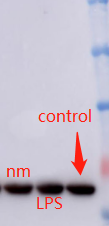

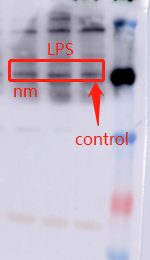


Figure S11 α-tublin original image

Figure S10 NLRP1original image


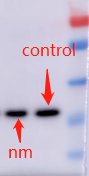


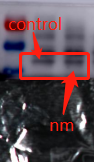


Figure S13 GAPDH original image

Figure S12 CSTB original image


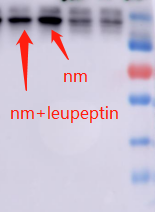

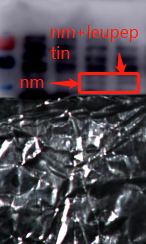


Figure S15 NLRP3 original image

Figure S14 CSTB original image


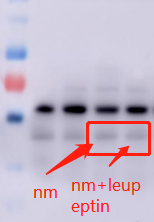

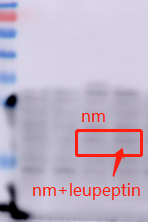


Figure S17 Caspase-1 original image

Figure S16 ASC original image


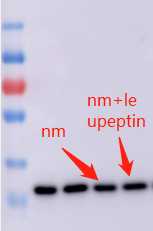


nm:SiNP

Figure S18 GAPDH original image
